# Supplementary material for: Wearable High Voltage Compliant Current Stimulator for Restoring Sensory Feedback
Source: MDPI journal article supplement (doi:10.3390/mi14040782), 2023-03-30
Supplement: s1 [file s1]

# Wearable High Voltage Compliant Current Stimulator For Sensory Feedback Restoring

Riccardo Collu<sup>1</sup>, Roberto Paolini<sup>2</sup>, Martina Bilotta<sup>2</sup>, Andrea Demofonti<sup>2</sup>, Francesca Cordella<sup>2</sup>, Loredana Zollo<sup>2</sup> and Massimo Barbaro<sup>1\*</sup>

<sup>1</sup> Department of Electrical and Electronics Engineering, University of Cagliari, Piazza D'Armi, 09123 Cagliari, Italy; riccardo.collu@unica.it; massimo.barbaro@unica.it

<sup>2</sup> Research Unit of Advanced Robotics and Human-Centred Technologies (CREO Lab), Università Campus Bio-Medico di Roma, Rome, Italy; r.paolini@unicampus.it; martina.bilotta@alcampus.it; a.demofonti@unicampus.it; f.cordella@unicampus.it; l.zollo@unicampus.it

\* Correspondence massimo.barbaro@unica.it

## Results and Discussion

Measurements reported in results and discussion were reproduced on 1.05k $\Omega$  and 4.7k $\Omega$  resistive load as reported in

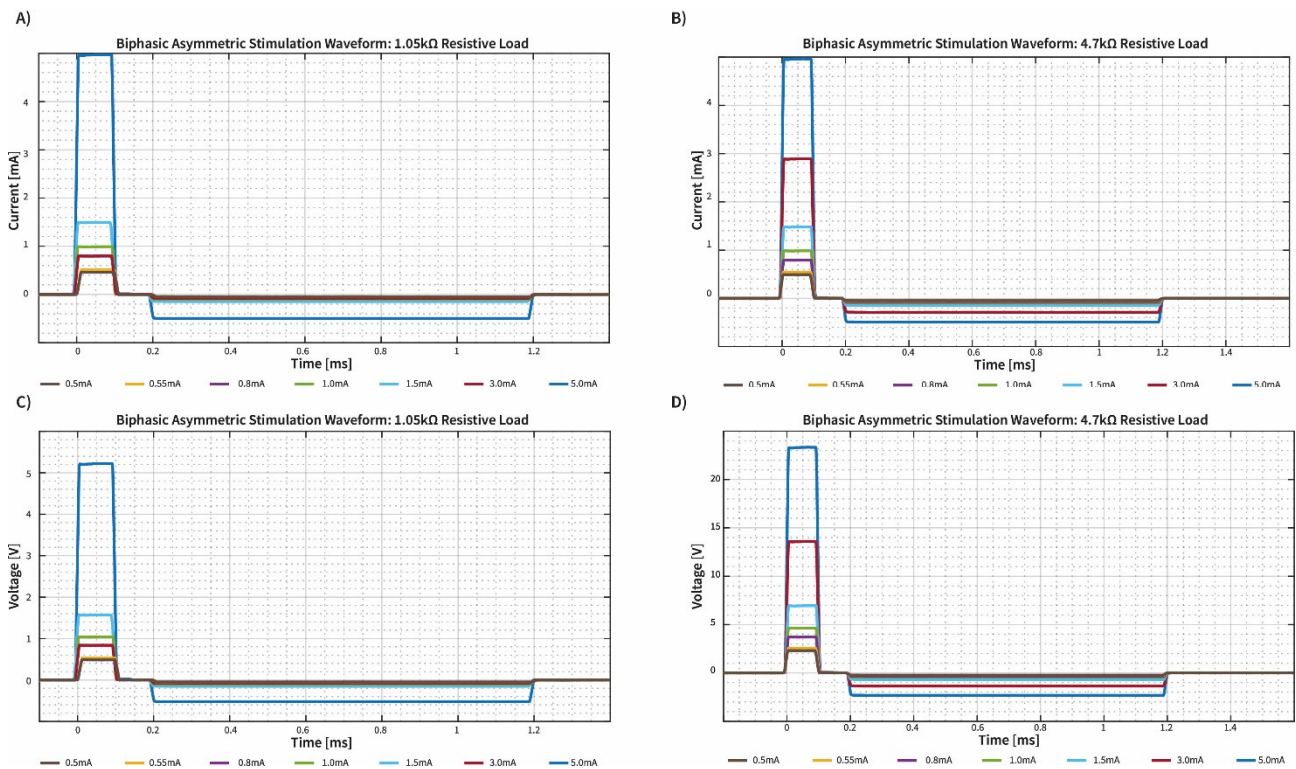

Figure S1 Waveform generation capability using Biphasic asymmetric waveforms with different amplitude and pulse width 100 $\mu$ s were tested on 1.05k $\Omega$  resistive load (A-C) and on 4.7k $\Omega$  (B-D)

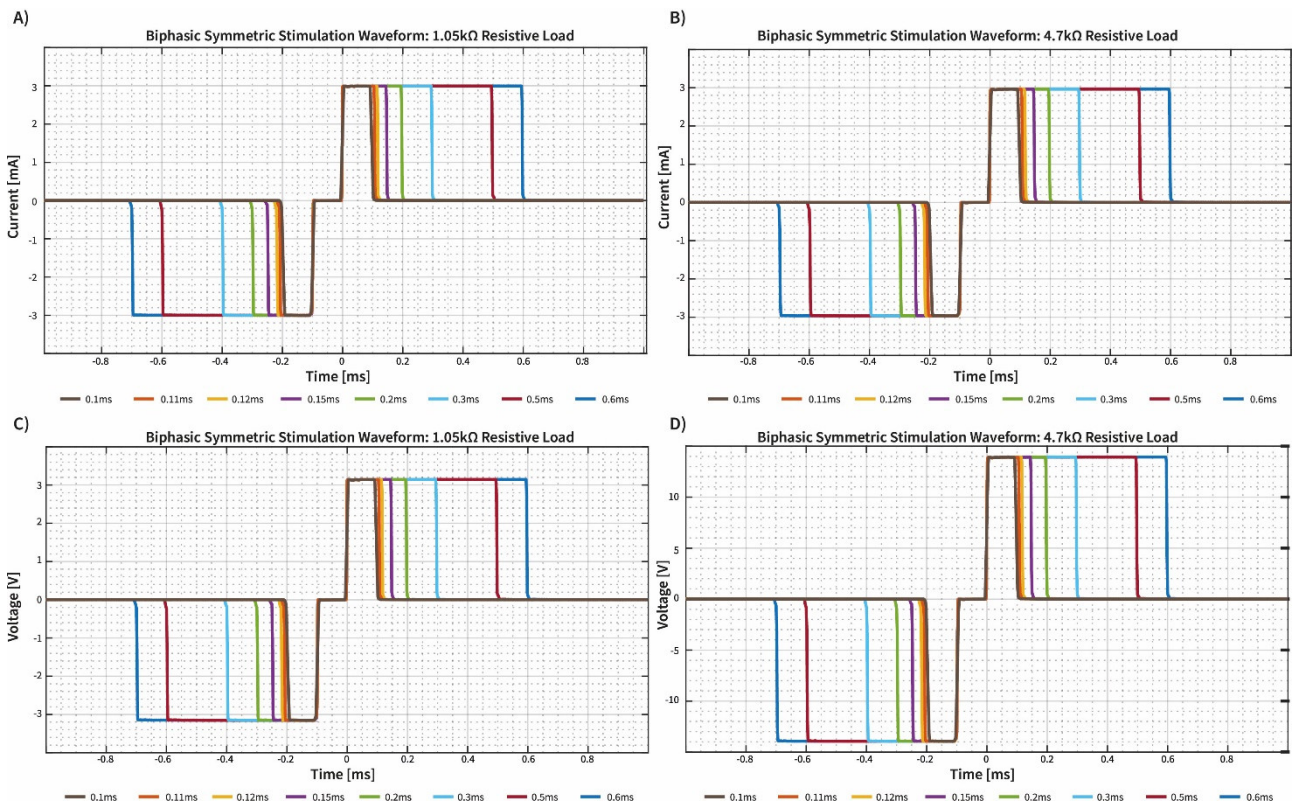

Figure S2 Waveform generation capability using Biphasic symmetric waveforms with different pulse width and amplitude 3mA were tested on 1.05k $\Omega$  resistive load (A-C) and on 4.7k $\Omega$  (B-D)
